# Supplementary figures and images for: A family of solar light responsive photocatalysts obtained using Zn2+Me3+(Me = Al/Ga) LDHs doped with Ga2O3and In2O3and their derived mixed oxides: a case study of phenol/4-nitrophenol decomposition
Source: Royal Society of Chemistry journal article supplement (doi:10.1039/c7cy01404j), 2017-01-01

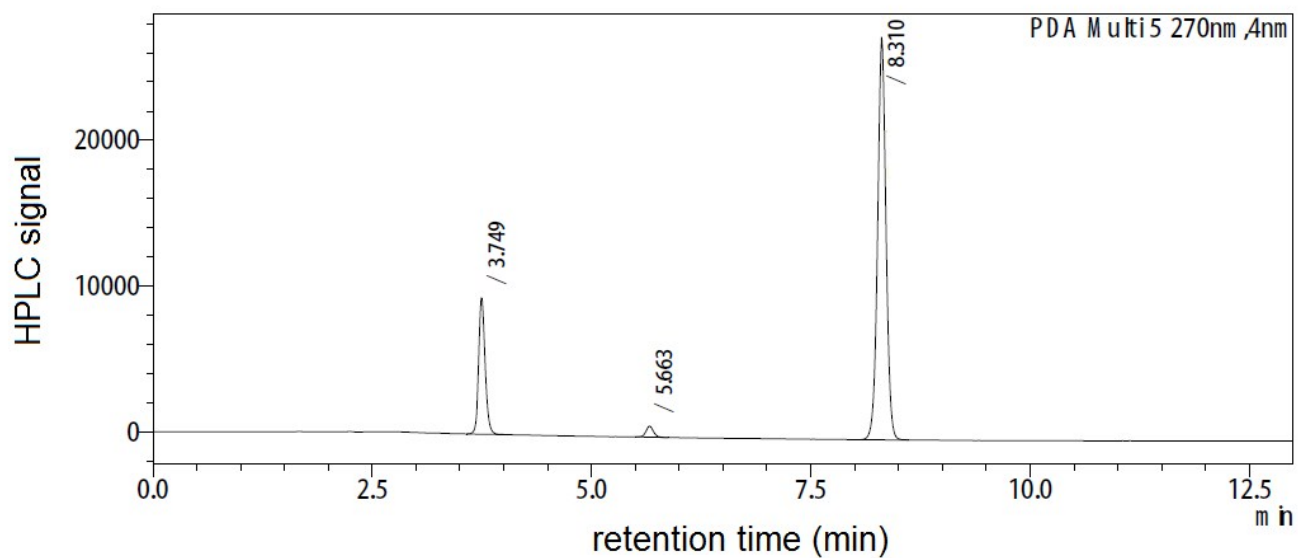

Fig. S1. The HPLC profile of the photocatalytic degradation using In/Zn<sub>3</sub>Ga<sub>7</sub>50 catalyst.

Supplement: c7cy01404j1.pdf [file c7cy01404j1.pdf]
